# Supplementary material for: Valle Agricola Chickpeas: Nutritional Profile and Metabolomics Traits of a Typical Landrace Legume from Southern Italy
Source: PubMed Central journal article supplement (PMC8002183; doi:10.3390/foods10030583), 2021-03-10
Supplement: foods-10-00583-s001.pdf [file foods-10-00583-s001.pdf]

**Table S1.** Soluble raw proteins and IC<sub>50</sub> of anti-protease inhibitor activity after thermal treatment of chickpeas seeds collected in the years 2017 and 2018. Values are means ( $\pm$ SD) of triplicate analyses (n = 3).

| Anti-proteinase inhibitor activity | thermal treatment time (min) | raw protein (mg/mL) |       | IC <sub>50</sub> ( $\mu$ g proteinase inhibitor) |       | Mean                |                                                  |
|------------------------------------|------------------------------|---------------------|-------|--------------------------------------------------|-------|---------------------|--------------------------------------------------|
|                                    |                              | harvest year        |       |                                                  |       | raw protein (mg/mL) | IC <sub>50</sub> ( $\mu$ g proteinase inhibitor) |
|                                    |                              | 2017                | 2018  | 2017                                             | 2018  |                     |                                                  |
| <b>anti-trypsin activity</b>       |                              |                     |       |                                                  |       |                     |                                                  |
|                                    | 0                            | 19.11               | 19.38 | 1.19                                             | 1.01  | 19.25 $\pm$ 0.19    | 1.10 $\pm$ 0.12                                  |
|                                    | 60                           | 1.27                | 1.06  | 3.82                                             | 5.07  | 1.17 $\pm$ 0.15     | 4.45 $\pm$ 0.89                                  |
|                                    | 120                          | 0.87                | 0.72  | 4.48                                             | 4.12  | 0.80 $\pm$ 0.11     | 4.30 $\pm$ 0.25                                  |
| <b>anti-chymotrypsin activity</b>  |                              |                     |       |                                                  |       |                     |                                                  |
|                                    | 0                            | 19.11               | 19.38 | 1.58                                             | 1.22  | 19.25 $\pm$ 0.19    | 1.40 $\pm$ 0.25                                  |
|                                    | 60                           | 1.27                | 1.06  | 5.81                                             | 8.36  | 1.17 $\pm$ 0.15     | 7.08 $\pm$ 1.80                                  |
|                                    | 120                          | 0.87                | 0.72  | 12.81                                            | 11.39 | 0.80 $\pm$ 0.11     | 12.10 $\pm$ 1.00                                 |
